# Supplementary material
Source: PubMed Central journal article supplement (PMC4787883)
Supplement: wans734756.ww1_default.pdf [file wans734756.ww1_default.pdf]

## Webappendix 1: Standardised effects per trial arm and timepoint

| Trial                 | Intervention = trial arm                        | Outcome                                 | N of patients | Month 3 |      | Month 6 |      | Month 9 |      | Month 12 |      | Month 15 |      | Month 18 |      | Month 21 |      | Month 24 |      |      |
|-----------------------|-------------------------------------------------|-----------------------------------------|---------------|---------|------|---------|------|---------|------|----------|------|----------|------|----------|------|----------|------|----------|------|------|
|                       |                                                 |                                         |               | Mean    | SE   | Mean    | SE   | Mean    | SE   | Mean     | SE   | Mean     | SE   | Mean     | SE   | Mean     | SE   | Mean     | SE   | Mean |
| Clegg 2006            | Chondroitin sulfate                             | WOMAC pain subscale                     | 318           |         |      | 1.36    | 0.06 |         |      |          |      |          |      |          |      |          |      |          |      |      |
| Clegg 2006            | Glucosamine hydrochloride                       | WOMAC pain subscale                     | 317           |         |      | 1.34    | 0.06 |         |      |          |      |          |      |          |      |          |      |          |      |      |
| Clegg 2006            | Glucosamine hydrochloride + chondroitin sulfate | WOMAC pain subscale                     | 317           |         |      | 1.24    | 0.05 |         |      |          |      |          |      |          |      |          |      |          |      |      |
| Clegg 2006            | Placebo                                         | WOMAC pain subscale                     | 313           |         |      | 1.36    | 0.06 |         |      |          |      |          |      |          |      |          |      |          |      |      |
| Herrero-Beaumont 2007 | Glucosamine sulfate                             | Lequesne global scale                   | 106           | 1.61    | 0.10 | 1.44    | 0.11 |         |      |          |      |          |      |          |      |          |      |          |      |      |
| Herrero-Beaumont 2007 | Placebo                                         | Lequesne global scale                   | 104           | 1.87    | 0.10 | 1.83    | 0.11 |         |      |          |      |          |      |          |      |          |      |          |      |      |
| Mazieres 2006         | Chondroitin sulfate                             | Pain on activities (other than walking) | 153           | 1.76    | 0.08 | 1.58    | 0.09 | 1.45    | 0.08 |          |      |          |      |          |      |          |      |          |      |      |
| Mazieres 2006         | Placebo                                         | Pain on activities (other than walking) | 154           | 1.85    | 0.07 | 1.80    | 0.08 | 1.76    | 0.08 |          |      |          |      |          |      |          |      |          |      |      |
| McAlindon 2004        | Glucosamine sulfate                             | WOMAC pain subscale                     | 101           | 1.48    | 0.09 |         |      |         |      |          |      |          |      |          |      |          |      |          |      |      |
| McAlindon 2004        | Placebo                                         | WOMAC pain subscale                     | 104           | 1.48    | 0.13 |         |      |         |      |          |      |          |      |          |      |          |      |          |      |      |
| Michel 2005           | Chondroitin sulfate                             | WOMAC pain subscale                     | 150           |         |      |         |      |         |      |          |      |          |      |          |      |          |      |          | 1.42 | 0.08 |
| Michel 2005           | Placebo                                         | WOMAC pain subscale                     | 150           |         |      |         |      |         |      |          |      |          |      |          |      |          |      |          | 1.62 | 0.08 |
| Noack 1994            | Glucosamine sulfate                             | Lequesne global scale                   | 120           | 1.49    | 0.10 |         |      |         |      |          |      |          |      |          |      |          |      |          |      |      |
| Noack 1994            | Placebo                                         | Lequesne global scale                   | 121           | 1.69    | 0.08 |         |      |         |      |          |      |          |      |          |      |          |      |          |      |      |
| Pavelka 2002          | Glucosamine sulfate                             | Lequesne global scale                   | 101           | 3.37    | 0.09 | 3.19    | 0.11 | 3.03    | 0.10 | 3.00     | 0.12 | 2.94     | 0.12 | 2.96     | 0.11 | 2.83     | 0.11 | 2.97     | 0.11 |      |
| Pavelka 2002          | Placebo                                         | Lequesne global scale                   | 101           | 3.59    | 0.09 | 3.45    | 0.09 | 3.38    | 0.10 | 3.35     | 0.11 | 3.29     | 0.08 | 3.15     | 0.10 | 3.20     | 0.10 | 3.22     | 0.10 |      |
| Reginster 2001        | Glucosamine sulfate                             | WOMAC pain subscale                     | 106           |         |      |         |      |         |      |          |      |          |      |          |      |          |      |          | 1.53 | 0.08 |
| Reginster 2001        | Placebo                                         | WOMAC pain subscale                     | 106           |         |      |         |      |         |      |          |      |          |      |          |      |          |      |          | 1.60 | 0.11 |
| Rozendaal 2009        | Glucosamine sulfate                             | Pain overall                            | 111           | 1.07    | 0.09 | 1.08    | 0.09 | 1.00    | 0.09 | 1.15     | 0.10 | 1.06     | 0.09 | 1.02     | 0.09 | 1.06     | 0.09 | 1.12     | 0.10 |      |
| Rozendaal 2009        | Placebo                                         | Pain overall                            | 111           | 1.07    | 0.09 | 1.06    | 0.09 | 1.12    | 0.09 | 1.10     | 0.10 | 1.17     | 0.10 | 1.18     | 0.10 | 1.18     | 0.10 | 1.15     | 0.10 |      |
| Kahan 2009            | Chondroitin sulfate                             | Pain overall                            | 309           | 1.41    | 0.06 | 1.26    | 0.06 | 1.20    | 0.06 | 1.25     | 0.06 | 1.26     | 0.06 | 1.23     | 0.06 | 1.18     | 0.06 | 1.21     | 0.06 |      |
| Kahan 2009            | Placebo                                         | Pain overall                            | 313           | 1.58    | 0.06 | 1.49    | 0.06 | 1.40    | 0.06 | 1.32     | 0.06 | 1.27     | 0.06 | 1.26     | 0.06 | 1.26     | 0.06 | 1.23     | 0.06 |      |

N, number; SE, standard error
