# Supplementary material
Source: PubMed Central journal article supplement (PMC4787883)
Supplement: wans734756.ww2_default.pdf [file wans734756.ww2_default.pdf]

## Webappendix 2: Additional results

All results relate to a 10 cm visual analogue scale for pain intensity.

### Comparison of results from primary network meta-analysis and meta-analysis of direct comparisons

|                            | Network meta-analysis<br>(95%-CI) | Standard meta-analysis of<br>direct comparisons (95%-CI) |
|----------------------------|-----------------------------------|----------------------------------------------------------|
| Glucosamine vs placebo     | -0.4 (-0.7 to -0.1)               | -0.4 (-0.7 to 0.0)                                       |
| Between-trial $\tau^2$     | 0.04                              | 0.07                                                     |
| Between-timepoint $\tau^2$ | 0.04                              | 0.03                                                     |
| Chondroitin vs placebo     | 0.3 (-0.7 to 0.0)                 | -0.4 (-1.0 to 0.2)                                       |
| Between-trial $\tau^2$     | 0.04                              | 0.04                                                     |
| Between-timepoint $\tau^2$ | 0.04                              | 0.05                                                     |

### Analysis including a linear term for time

|                            | Network meta-analysis<br>(95%-CI) | Standard meta-analysis of<br>direct comparisons (95%-CI) |
|----------------------------|-----------------------------------|----------------------------------------------------------|
| Glucosamine vs placebo     | -0.20 (-0.50 to 0.12)             | -0.18 (-0.54 to 0.21)                                    |
| Between-trial $\tau^2$     | 0.04                              | 0.08                                                     |
| Between-timepoint $\tau^2$ | 0.03                              | 0.02                                                     |
| Timetrend (per month)      | 0.02 (-0.03 to 0.0)               | -0.02 (-0.03 to 0.0)                                     |
| Chondroitin vs placebo     | -0.13 (-0.49 to 0.23)             | -0.15 (-0.84 to 0.58)                                    |
| Between-trial $\tau^2$     | 0.04                              | 0.06                                                     |
| Between-timepoint $\tau^2$ | 0.03                              | 0.04                                                     |
| Timetrend (per month)      | 0.02 (-0.03 to 0.0)               | -0.02 (-0.04 to 0.01)                                    |

**Sensitivity analysis 1: uniform prior for between trial standard deviation**

Glucosamine vs placebo: -0.41 (-0.7 to -0.1)

Chondroitin vs placebo: -0.3 (-0.7 to 0.0)

Combination vs placebo: -0.5 (-0.9 to 0.0)

Between-trial  $\tau^2$ : 0.05

Between-timepoint  $\tau^2$ : 0.04

**Sensitivity analysis 2: Longest follow-up available only**

Glucosamine vs placebo: -0.5 (-0.8 to -0.1)

Chondroitin vs placebo: -0.3 (-0.7 to 0.1)

Combination vs placebo: -0.4 (-0.8 to 0.0)

Between-trial  $\tau^2$ : 0.08

Between-timepoint  $\tau^2$ : n/a
